# Supplementary material
Source: ML conference proceedings conference paper supplement (https://www.ecva.net/papers/eccv_2020/papers_ECCV/html/123590341_ECCV_2020_paper.php)
Supplement: Supplementary file 2 [file 123590341-supp.zip]

Archive with 4 entries (3 files):
- 2136-supplementary-material/
- 2136-supplementary-material/2136_supplementary_material.pdf
- 2136-supplementary-material/annotation_demo.avi
- 2136-supplementary-material/detailed_shape_demo.avi
